# Supplementary material
Source: HighWire-hosted journal article supplement (https://adc.bmj.com/content/108/7/e12)
Supplement: inline-supplementary-material-3 [file inline-supplementary-material-3.pdf]

**Table S1:** Key characteristics of the REACT-1 study population aged 5-17 years for rounds 10-19. Numbers are reported for the full sample and by history of COVID-19 status, N=191,593

|                     | Category                                    | Overall<br>N (%; 95% CI) <sup>a</sup> | Response to history of COVID-19<br>N (%; 95% CI) <sup>a</sup> | Missing response to history of<br>COVID-19<br>N (%; 95% CI) <sup>a</sup> | p-value <sup>b</sup> |
|---------------------|---------------------------------------------|---------------------------------------|---------------------------------------------------------------|--------------------------------------------------------------------------|----------------------|
|                     | All participants                            | 191,593                               | 111,444 (58.2; 57.9-58.4)                                     | 80,149 (41.8; 41.6-42.1)                                                 |                      |
| <b>Sex</b>          | Male                                        | 91,788 (47.9; 47.7-48.1)              | 52,190 (46.8; 46.5-47.1)                                      | 39,598 (49.4; 49.1-49.8)                                                 | <0.001               |
|                     | Female                                      | 99,805 (52.1; 51.9-52.3)              | 59,254 (53.2; 52.9-53.5)                                      | 40,551 (50.6; 50.2-50.9)                                                 |                      |
| <b>Age</b>          | 5-11                                        | 87,915 (45.9; 45.7-46.1)              | 50,438 (45.3; 45.0-45.6)                                      | 37,477 (46.8; 46.4-47.1)                                                 | <0.001               |
|                     | 12-17                                       | 103,678 (54.1; 53.9-54.3)             | 61,006 (54.7; 54.4-55.0)                                      | 42,672 (53.2; 52.9-53.6)                                                 |                      |
| <b>Ethnicity</b>    | White                                       | 146,882 (78.4; 78.2-78.6)             | 88,090 (80.5; 80.3-80.7)                                      | 58,792 (75.5; 75.2-75.8)                                                 | <0.001               |
|                     | Mixed                                       | 10,760 (5.7; 5.6-5.9)                 | 6,387 (5.8; 5.7-6.0)                                          | 4,373 (5.6; 5.5-5.8)                                                     |                      |
|                     | Asian / Asian British                       | 19,595 (10.5; 10.3-10.6)              | 10,004 (9.1; 9.0-9.3)                                         | 9,591 (12.3; 12.1-12.5)                                                  |                      |
|                     | Black / African / Caribbean / Black British | 7,085 (3.8; 3.7-3.9)                  | 3,435 (3.1; 3.0-3.2)                                          | 3,650 (4.7; 4.5-4.8)                                                     |                      |
|                     | Other                                       | 2,980 (1.6; 1.5-1.7)                  | 1,503 (1.4; 1.3-1.4)                                          | 1,477 (1.90 1.4-1.5)                                                     |                      |
| <b>IMD quintile</b> | 1 – most deprived                           | 28,810 (15.0; 14.9-15.2)              | 14,098 (12.7; 12.5-12.8)                                      | 14,712 (18.4; 18.1-18.6)                                                 | <0.001               |
|                     | 2                                           | 32,572 (17.0; 16.8-17.2)              | 17,624 (15.8; 15.6-16.0)                                      | 14,948 (18.7; 18.4-18.9)                                                 |                      |
|                     | 3                                           | 37,837 (19.7; 19.6-19.9)              | 22,181 (19.9; 19.7-20.1)                                      | 15,656 (19.5; 19.3-19.8)                                                 |                      |
|                     | 4                                           | 41,725 (21.8; 21.6-22.0)              | 25,443 (22.8; 22.6-23.1)                                      | 16,282 (20.3; 20.0-20.6)                                                 |                      |
|                     | 5 – least deprived                          | 50,649 (26.4; 26.2-26.6)              | 32,098 (28.8; 28.5-29.1)                                      | 18,551 (23.2; 22.9-23.4)                                                 |                      |
| <b>Region</b>       | North East                                  | 7,510 (3.92; 3.83-4.01)               | 4,146 (3.72; 3.61-3.83)                                       | 3,364 (4.20; 4.06-4.34)                                                  | <0.001               |
|                     | North West                                  | 21,715 (11.3; 11.2-11.5)              | 12,067 (10.8; 10.6-11.0)                                      | 9,648 (12.0; 11.8-12.3)                                                  |                      |
|                     | Yorkshire and The Humber                    | 16,992 (8.87; 8.74-9.00)              | 9,760 (8.76; 8.59-8.93)                                       | 7,232 (9.02; 8.83-9.22)                                                  |                      |
|                     | East Midlands                               | 18,415 (9.61; 9.48-9.74)              | 10,685 (9.59; 9.42-9.76)                                      | 7,730 (9.64; 9.44-9.85)                                                  |                      |
|                     | West Midlands                               | 19,746 (10.3; 10.2-10.4)              | 11,023 (9.89; 9.72-10.1)                                      | 8,723 (10.9; 10.7-11.1)                                                  |                      |
|                     | East of England                             | 23,169 (12.1; 11.9-12.2)              | 13,841 (12.4; 12.2-12.6)                                      | 9,328 (11.6; 11.4-11.9)                                                  |                      |

|              |            |                          |                          |                          |        |
|--------------|------------|--------------------------|--------------------------|--------------------------|--------|
|              | London     | 29,765 (15.5; 15.4-15.7) | 17,004 (15.3; 15.0-15.5) | 12,761 (15.9; 15.7-16.2) |        |
|              | South East | 35,683 (18.6; 18.5-18.8) | 21,595 (19.4; 19.1-19.6) | 14,088 (17.6; 17.3-17.8) |        |
|              | South West | 18,598 (9.71; 9.58-9.84) | 11,323 (10.2; 9.98-10.3) | 7,275 (9.08; 8.88-9.28)  |        |
| <b>Round</b> | 10         | 25,049 (13.1; 12.9-13.2) | 15,955 (14.3; 14.1-14.5) | 9,094 (11.4; 11.1-11.6)  | <0.001 |
|              | 11         | 21,625 (11.3; 11.1-11.4) | 13,269 (11.9; 11.7-12.1) | 8,356 (10.4; 10.2-10.6)  |        |
|              | 12         | 21,795 (11.4; 11.2-11.5) | 11,432 (10.3; 10.1-10.4) | 10,363 (12.9; 12.7-13.2) |        |
|              | 13         | 19,773 (10.3; 10.2-10.5) | 10,542 (9.46; 9.29-9.63) | 9,231 (11.5; 11.3-11.7)  |        |
|              | 14         | 18,393 (9.60; 9.47-9.73) | 10,050 (9.02; 8.85-9.19) | 8,343 (10.4; 10.2-10.6)  |        |
|              | 15         | 17,496 (9.13; 9.00-9.26) | 10,175 (9.13; 8.96-9.30) | 7,321 (9.13; 8.94-9.34)  |        |
|              | 16         | 15,391 (8.03; 7.91-8.16) | 8,805 (7.90; 7.74-8.06)  | 6,586 (8.22; 8.03-8.41)  |        |
|              | 17         | 16,260 (8.49; 8.36-8.61) | 9,838 (8.83; 8.66-9.00)  | 6,422 (8.01; 7.83-8.20)  |        |
|              | 18         | 16,716 (8.72; 8.60-8.85) | 9,703 (8.71; 8.54-8.87)  | 7,013 (8.75; 8.56-8.95)  |        |
|              | 19         | 19,095 (9.97; 9.83-10.1) | 11,675 (10.5; 10.3-10.7) | 7,420 (9.26; 9.06-9.46)  |        |

<sup>a</sup> Percentages are calculated from non-missing values; <sup>b</sup> P-value calculated using Pearson's chi-squared test

**Table S2:** Odds ratios for persistent symptoms at 3 months among symptomatic respondents, derived from logistic regression models used in the main analysis, N=10,059 (forest plot in Figure 2).

| Predictor                                      | Participants aged 5-11 years            |                                            | Participants aged 12-17 years           |                                            |
|------------------------------------------------|-----------------------------------------|--------------------------------------------|-----------------------------------------|--------------------------------------------|
|                                                | Crude (univariate) Odds Ratio (95% CIs) | <sup>a</sup> Adjusted Odds Ratio (95% CIs) | Crude (univariate) Odds Ratio (95% CIs) | <sup>b</sup> Adjusted Odds Ratio (95% CIs) |
| <b>Sex</b>                                     |                                         |                                            |                                         |                                            |
| Male                                           | -                                       | -                                          | -                                       | -                                          |
| Female                                         | 1.12 (0.80-1.58)                        | 1.16 (0.82-1.64)                           | 2.61 (2.22-3.06) ***                    | 2.40 (2.03-2.82)***                        |
| <b>Ethnicity</b>                               |                                         |                                            |                                         |                                            |
| White                                          | -                                       | -                                          | -                                       | -                                          |
| Mixed                                          | 0.71 (0.36-1.42)                        | 0.69 (0.34-1.38)                           | 0.81 (0.58-1.13)                        | 0.82 (0.58-1.15)                           |
| Asian / Asian British                          | 0.32 (0.10-1.03)                        | 0.35 (0.11-1.12)                           | 0.67 (0.50-0.90)**                      | 0.65 (0.48-0.88)**                         |
| Black / African / Caribbean / Black British    | 0.51 (0.07-3.71)                        | 0.56 (0.08-4.16)                           | 0.78 (0.45-1.37)                        | 0.67 (0.37-1.18)                           |
| Other                                          | 0.59 (0.08-4.38)                        | 0.63 (0.08-4.70)                           | 1.54 (0.89-2.68)                        | 1.26 (0.71-2.23)                           |
| <b>IMD quintile</b>                            |                                         |                                            |                                         |                                            |
| 1 – most deprived                              | -                                       | -                                          | -                                       | -                                          |
| 2                                              | 1.66 (0.79-3.48)                        | 1.70 (0.80-3.61)                           | 0.97 (0.76-1.24)                        | 0.96 (0.75-1.24)                           |
| 3                                              | 1.21 (0.58-2.56)                        | 1.17 (0.55-2.49)                           | 0.75 (0.59-0.95)*                       | 0.78 (0.61-0.99)*                          |
| 4                                              | 1.44 (0.70-2.95)                        | 1.39 (0.67-2.89)                           | 0.72 (0.57-0.91)**                      | 0.71 (0.55-0.91)**                         |
| 5 – least deprived                             | 1.38 (0.68-2.78)                        | 1.34 (0.66-2.73)                           | 0.76 (0.61-0.95)*                       | 0.78 (0.62-0.98)*                          |
| <b>Comorbidities</b>                           |                                         |                                            |                                         |                                            |
| No                                             | -                                       | -                                          | -                                       | -                                          |
| Yes                                            | 2.59 (1.77-3.78)***                     | 2.64 (1.80-3.90)***                        | 2.17 (1.88-2.51)***                     | 1.96 (1.68-2.27)***                        |
| <b>Vaccination status at time of infection</b> |                                         |                                            |                                         |                                            |
| No                                             | -                                       | -                                          | -                                       | -                                          |
| At least one dose                              | -                                       | -                                          | 0.92 (0.66-1.28)                        | 0.74 (0.52-1.04)                           |
| <b>Dominant variant at time of infection</b>   |                                         |                                            |                                         |                                            |
| Wild type (before Dec 2020)                    | -                                       | -                                          | -                                       | -                                          |
| Alpha (Dec 2020-April 2021)                    | 0.85 (0.49-1.47)                        | 0.92 (0.53-1.62)                           | 1.18 (0.95-1.46)                        | 1.16 (0.93-1.45)                           |
| Delta (May 2021-Dec 2021)                      | 1.31 (0.91-1.89)                        | 1.35 (0.93-1.97)                           | 1.43 (1.23-1.67)***                     | 1.56 (1.33-1.84)***                        |

<sup>a</sup>Mutually adjusted for sex, ethnicity, IMD, comorbidities and dominant variant at time of infection; <sup>b</sup>Mutually adjusted for sex, ethnicity, IMD, comorbidities and vaccination status and dominant variant at time of infection; \*p<0.05, \*\*p<0.01\*; \*\*\*p<0.001

Sensitivity analysis was performed restricting the outcome to test confirmed COVID-19.

In sensitivity analysis, restricting to children and young people who reported having had COVID-19 confirmed by a test, the magnitude and direction of associations between sociodemographic factors and persistent symptoms were similar (Supplementary Table S6).

**Table S3.** Number and proportion of individual symptoms among participants with persistent symptoms at 3 months or more post COVID-19 onset for whom we have 3 months follow-up and complete data.

| Symptom                                                                                                                                                                                                     | Age 5-11                  | Age 12-17                    |
|-------------------------------------------------------------------------------------------------------------------------------------------------------------------------------------------------------------|---------------------------|------------------------------|
|                                                                                                                                                                                                             | n (%; 95% CI)             | n (%; 95% CI)                |
| Cohort with persistent symptoms at 3 months post COVID-19 onset / Cohort who experienced ≥1 symptom at time of infection, and who reported symptom onset date ≥3 months (≥91 days) before their survey date | 138/3,173 (4.4%; 3.7-5.1) | 913/6,886 (13.3%; 12.5-14.1) |
| Loss or change of sense of smell                                                                                                                                                                            | 19 (13.9; 9.0-20.8)       | 470 (52.2; 48.9-55.5)        |
| Loss or change of sense of taste                                                                                                                                                                            | 21 (15.4; 10.3-22.6)      | 366 (40.7; 37.5-44.0)        |
| Fever                                                                                                                                                                                                       | 4 (3.0; 1.1-7.7)          | 9 (1.0; 0.52-1.9)            |
| Coughing                                                                                                                                                                                                    | 37 (27.4; 20.5-35.6)      | 57 (6.4; 4.9-8.1)            |
| Runny or blocked nose                                                                                                                                                                                       | 9 (6.7; 3.5-12.4)         | 49 (5.5; 4.2-7.2)            |
| Sneezing                                                                                                                                                                                                    | 10 (7.3; 4.0-13.1)        | 23 (2.6; 1.7-3.8)            |
| Itchy, sore or red eyes, conjunctivitis                                                                                                                                                                     | 7 (5.1; 2.4-10.4)         | 17 (1.9; 1.2-3.0)            |
| Vision issues                                                                                                                                                                                               | 1 (0.74; 0.10-5.1)        | 21 (2.3; 1.5-3.5)            |
| Sore throat or hoarse voice                                                                                                                                                                                 | 11 (8.0; 4.5-14.0)        | 28 (3.1; 2.2-4.5)            |
| Hearing issues (e.g. hearing loss, Tinnitus etc)                                                                                                                                                            | 4 (2.9; 1.1-7.5)          | 17 (1.9; 1.2-3.0)            |
| Skin issues (itchy, scaly, redness, etc)                                                                                                                                                                    | 11 (8.0; 4.5-13.9)        | 33 (3.7; 2.6-5.1)            |
| Sudden swelling of the face or lips                                                                                                                                                                         | 0 (0.0; 0.0-0.03)         | 0 (0.0; 0.0-0.01)            |
| Leg swelling (Thrombosis)                                                                                                                                                                                   | 0 (0.0; 0.0-0.03)         | 1 (0.11; 0.02-0.78)          |
| Red/purple sores or blisters on your feet (including toes)                                                                                                                                                  | 5 (3.6; 1.5-8.4)          | 20 (2.2; 1.4-3.4)            |
| Hair loss                                                                                                                                                                                                   | 5 (3.6; 1.5-8.4)          | 34 (3.7; 2.7-5.2)            |
| Appetite loss                                                                                                                                                                                               | 15 (11.0; 6.7-17.5)       | 105 (11.8; 9.8-14.0)         |
| Weight loss                                                                                                                                                                                                 | 7 (5.2; 2.5-10.4)         | 32 (3.5; 2.5-5.0)            |
| Abdominal issues (stomach ache, diarrhoea, nausea, vomiting)                                                                                                                                                | 29 (21.8; 15.6-30.0)      | 77 (8.6; 6.9-10.6)           |
| Dizziness, vertigo                                                                                                                                                                                          | 8 (5.8; 2.9-11.3)         | 84 (9.4; 7.6-11.5)           |
| Confusion "brain fog", forgetfulness                                                                                                                                                                        | 16 (11.6; 7.2-18.1)       | 92 (10.5; 8.6-12.7)          |
| Headaches                                                                                                                                                                                                   | 33 (25.4; 18.6-33.6)      | 139 (16.3; 13.9-18.9)        |
| Shortness of breath, breathlessness, wheezing                                                                                                                                                               | 23 (16.7; 11.3-23.9)      | 149 (16.7; 14.4-19.3)        |
| Tightness or heaviness in chest, chest pain                                                                                                                                                                 | 14 (10.2; 6.1-16.6)       | 106 (11.8; 9.9-14.1)         |
| Heart issues (racing heart, palpitations, irregular heartbeat etc)                                                                                                                                          | 8 (5.8; 2.9-11.3)         | 63 (7.0; 5.5-8.8)            |

|                                                   |                      |                       |
|---------------------------------------------------|----------------------|-----------------------|
| Difficulty sleeping                               | 23 (16.7; 11.3-23.9) | 127 (14.2; 12.0-16.6) |
| Mild fatigue (e.g. feeling tired)                 | 34 (24.8; 18.3-32.8) | 199 (22.1; 19.5-25.0) |
| Severe fatigue (e.g. inability to get out of bed) | 5 (3.6; 1.5-8.4)     | 59 (6.6; 5.1-8.4)     |
| Numbness or tingling somewhere in the body        | 1 (0.73; 0.10-5.0)   | 20 (2.2; 1.4-3.4)     |
| Achy or cramping muscles, pain in muscles         | 21 (15.6; 10.3-22.7) | 73 (8.1; 6.5-10.1)    |
| Pain in joints                                    | 18 (13.1; 8.4-19.9)  | 61 (6.8; 5.3-8.6)     |

**Table S4.** Sociodemographic proportions of the REACT-1 study population aged 5-17 years for rounds 10-19 and participants included in our study compared to England population aged 5-17 years.

|                          | England (5-17 population) <sup>1, 2</sup> | REACT-1 population (5-17) | Study population (5-17) |
|--------------------------|-------------------------------------------|---------------------------|-------------------------|
|                          | N=8,853,841                               | N=191,593                 | N=111,444               |
|                          | %                                         | %                         | %                       |
| <b>Sex</b>               |                                           |                           |                         |
| Male                     | 51.3                                      | 47.9                      | 46.8                    |
| Female                   | 48.7                                      | 52.1                      | 53.2                    |
| <b>Age</b>               |                                           |                           |                         |
| 5-11                     | 55.7                                      | 45.9                      | 45.3                    |
| 12-17                    | 44.3                                      | 54.1                      | 54.7                    |
| <b>Ethnicity</b>         |                                           |                           |                         |
| White                    | 79.2                                      | 78.4                      | 80.5                    |
| Mixed                    | 4.6                                       | 5.7                       | 5.8                     |
| Asian                    | 10.2                                      | 10.5                      | 9.1                     |
| Black                    | 4.6                                       | 3.8                       | 3.1                     |
| Other                    | 1.3                                       | 1.6                       | 1.4                     |
| <b>Region</b>            |                                           |                           |                         |
| North East               | 4.5                                       | 3.9                       | 3.7                     |
| North West               | 13.0                                      | 11.3                      | 10.8                    |
| Yorkshire and The Humber | 9.8                                       | 8.9                       | 8.8                     |
| East Midlands            | 8.4                                       | 9.6                       | 9.6                     |
| West Midlands            | 10.8                                      | 10.3                      | 9.9                     |
| East of England          | 11.2                                      | 12.1                      | 12.4                    |
| London                   | 16.4                                      | 15.5                      | 15.3                    |
| South East               | 16.6                                      | 18.6                      | 19.4                    |
| South West               | 9.4                                       | 9.7                       | 10.2                    |
| <b>IMD Quintile</b>      |                                           |                           |                         |
| 1 – most deprived        | 19.8                                      | 15.0                      | 12.7                    |
| 2                        | 20.9                                      | 17.0                      | 15.8                    |
| 3                        | 20.4                                      | 19.7                      | 19.9                    |
| 4                        | 19.7                                      | 21.8                      | 22.8                    |
| 5 – least deprived       | 19.1                                      | 26.4                      | 28.8                    |

1 Office\_for\_National\_Statistics. Population estimates for the UK, England and Wales, Scotland and Northern Ireland: mid2019 2020 [Available from: <https://www.ons.gov.uk/releases/populationestimatesfortheukenglandandwalesscotlandandnorthernirelandmid2019/>]

2 Office\_for\_National\_Statistics. Employee earnings in the UK: 2019 2019 [Available from: <https://www.ons.gov.uk/releases/employeearningsintheuk2019>].

**Table S5.** Number and proportion of individual symptoms among participants with persistent symptoms at 3 months or more post COVID-19 onset for whom we have 3 months follow-up and complete data, test confirmed vs. suspected COVID-19 cases.

| Symptom                                                                                                                                                                                                     | Age 5-11                 |                          | Age 12-17                    |                           |
|-------------------------------------------------------------------------------------------------------------------------------------------------------------------------------------------------------------|--------------------------|--------------------------|------------------------------|---------------------------|
|                                                                                                                                                                                                             | n (%; 95% CI)            |                          | n (%; 95% CI)                |                           |
|                                                                                                                                                                                                             | Test confirmed COVID-19  | Suspected COVID-19       | Test confirmed COVID-19      | Suspected COVID-19        |
| Cohort with persistent symptoms at 3 months post COVID-19 onset / Cohort who experienced ≥1 symptom at time of infection, and who reported symptom onset date ≥3 months (≥91 days) before their survey date | 71/1,382 (5.1%; 4.1-6.4) | 67/1,791 (3.7%; 3.0-4.7) | 692/4,313 (16.0%; 15.0-17.2) | 221/2,573 (8.6%; 7.6-9.7) |
| Loss or change of sense of smell                                                                                                                                                                            | 15 (21.4; 13.3-32.7)     | 4 (6.0; 2.2-15.0)        | 400 (58.7; 54.9-62.3)        | 70 (32.1; 26.2-38.6)      |
| Loss or change of sense of taste                                                                                                                                                                            | 17 (24.3; 15.6-35.7)     | 4 (6.0; 2.2-15.0)        | 306 (45.0; 41.3-48.8)        | 60 (27.4; 21.9-33.7)      |
| Fever                                                                                                                                                                                                       | 2 (2.9; 0.72-11.0)       | 2 (3.0; 0.75-11.4)       | 6 (0.87; 0.39-1.9)           | 3 (1.4; 0.45-4.3)         |
| Coughing                                                                                                                                                                                                    | 15 (21.4; 13.3-32.7)     | 22 (33.8; 23.4-46.2)     | 36 (5.3; 3.8-7.2)            | 21 (9.6; 6.4-14.3)        |
| Runny or blocked nose                                                                                                                                                                                       | 6 (8.6; 3.9-17.9)        | 3 (4.5; 1.4-13.1)        | 40 (5.9; 4.4-8.0)            | 9 (4.2; 2.2-8.0)          |
| Sneezing                                                                                                                                                                                                    | 6 (8.6; 3.9-17.9)        | 4 (6.0; 2.2-15.0)        | 19 (2.8; 1.8-4.3)            | 4 (1.8; 0.68-4.7)         |
| Itchy, sore or red eyes, conjunctivitis                                                                                                                                                                     | 5 (7.1; 3.0-16.1)        | 2 (3.0; 0.75-11.4)       | 11 (1.6; 0.89-2.9)           | 6 (2.8; 1.2-6.0)          |
| Vision issues                                                                                                                                                                                               | 1 (1.4; 0.20-9.6)        | 0 (0.0; 0.0-0.61)        | 12 (1.7; 0.99-3.0)           | 9 (4.1; 2.1-7.7)          |
| Sore throat or hoarse voice                                                                                                                                                                                 | 8 (11.4; 5.8-21.3)       | 3 (4.5; 1.4-13.1)        | 17 (2.5; 1.6-4.0)            | 11 (5.0; 2.8-8.9)         |
| Hearing issues (e.g. hearing loss, Tinnitus etc)                                                                                                                                                            | 1 (1.4; 0.20-9.6)        | 3 (4.5; 1.4-13.1)        | 13 (1.9; 1.1-3.2)            | 4 (1.8; 0.68-4.7)         |
| Skin issues (itchy, scaly, redness, etc)                                                                                                                                                                    | 4 (5.6; 2.1-14.2)        | 7 (10.4; 5.0-20.4)       | 20 (2.9; 1.9-4.5)            | 13 (6.0; 3.5-10.1)        |
| Sudden swelling of the face or lips                                                                                                                                                                         | 0 (0.0; 0.0-0.57)        | 0 (0.0; 0.0-0.61)        | 0 (0.0, 0.0-0.11)            | 0 (0.0, 0.0-0.31)         |
| Leg swelling (Thrombosis)                                                                                                                                                                                   | 0 (0.0; 0.0-0.57)        | 0 (0.0; 0.0-0.61)        | 0 (0.0, 0.0-0.11)            | 1 (0.45; 0.06-3.2)        |
| Red/purple sores or blisters on your feet (including toes)                                                                                                                                                  | 1 (1.4; 0.20-9.6)        | 4 (6.0; 2.2-15.0)        | 3 (0.43; 0.14-1.3)           | 17 (7.7; 4.8-12.0)        |
| Hair loss                                                                                                                                                                                                   | 3 (4.2; 1.4-12.4)        | 2 (3.0; 0.75-11.4)       | 24 (3.5; 2.3-5.2)            | 10 (4.5; 2.5-8.3)         |
| Appetite loss                                                                                                                                                                                               | 8 (11.4; 5.8-21.3)       | 7 (10.4; 5.0-20.4)       | 83 (12.2; 9.9-14.8)          | 22 (10.4; 7.0-15.3)       |
| Weight loss                                                                                                                                                                                                 | 2 (2.9; 0.72-11.0)       | 5 (7.5; 3.1-16.8)        | 23 (3.4; 2.2-5.0)            | 9 (4.1; 2.1-7.7)          |
| Abdominal issues (stomach ache, diarrhoea, nausea, vomiting)                                                                                                                                                | 14 (20.3; 12.3-31.5)     | 15 (23.4; 14.6-35.4)     | 46 (6.7; 5.1-8.9)            | 31 (14.6; 10.4-20.1)      |
| Dizziness, vertigo                                                                                                                                                                                          | 4 (5.6; 2.1-14.2)        | 4 (6.0; 2.2-15.0)        | 54 (7.9; 6.1-10.2)           | 30 (14.2; 10.1-19.5)      |
| Confusion "brain fog", forgetfulness                                                                                                                                                                        | 10 (14.1; 7.7-24.3)      | 6 (9.0; 4.1-18.6)        | 71 (10.6; 8.5-13.2)          | 21 (9.6; 6.4-14.3)        |
| Headaches                                                                                                                                                                                                   | 19 (29.7; 19.7-42.0)     | 14 (20.9; 12.7-32.4)     | 102 (15.6; 13.0-18.6)        | 37 (18.5; 13.7-24.5)      |
| Shortness of breath, breathlessness, wheezing                                                                                                                                                               | 10 (14.1; 7.7-24.3)      | 13 (19.4; 11.6-30.7)     | 104 (15.4; 12.8-18.3)        | 45 (20.7; 15.8-26.7)      |
| Tightness or heaviness in chest, chest pain                                                                                                                                                                 | 3 (4.2; 1.4-12.4)        | 11 (16.7; 9.4-27.8)      | 74 (10.8; 8.7-13.4)          | 32 (15.0; 10.8-20.5)      |
| Heart issues (racing heart, palpitations, irregular heartbeat etc)                                                                                                                                          | 3 (4.2; 1.4-12.4)        | 5 (7.5; 3.1-16.8)        | 42 (6.1; 4.5-8.1)            | 21 (9.6; 6.4-14.3)        |
| Difficulty sleeping                                                                                                                                                                                         | 13 (18.3; 10.9-29.1)     | 10 (14.9; 8.2-25.7)      | 85 (12.5; 10.2-15.2)         | 42 (19.3; 14.6-25.1)      |
| Mild fatigue (e.g. feeling tired)                                                                                                                                                                           | 20 (28.6; 19.2-40.3)     | 14 (20.9; 12.7-32.4)     | 151 (22.1; 19.2-25.4)        | 48 (22.1; 17.1-28.1)      |
| Severe fatigue (e.g. inability to get out of bed)                                                                                                                                                           | 3 (4.2; 1.4-12.4)        | 2 (3.0; 0.75-11.4)       | 42 (6.1; 4.5-8.1)            | 17 (7.7; 4.8-12.0)        |

|                                            |                     |                     |                   |                    |
|--------------------------------------------|---------------------|---------------------|-------------------|--------------------|
| Numbness or tingling somewhere in the body | 0 (0.0; 0.0-0.57)   | 1 (1.5; 0.21-10.0)  | 13 (1.9; 1.1-3.2) | 7 (3.2; 1.5-6.6)   |
| Achy or cramping muscles, pain in muscles  | 10 (14.1; 7.7-24.3) | 11 (16.7; 9.4-27.8) | 52 (7.6; 5.8-9.9) | 21 (9.6; 6.4-14.3) |
| Pain in joints                             | 8 (11.4; 5.8-21.3)  | 10 (14.9; 8.2-25.7) | 42 (6.1; 4.5-8.1) | 19 (8.9; 5.7-13.5) |



**Table S6:** Odds ratios for persistent symptoms at 3 months among symptomatic respondents, derived from logistic regression models used in sensitivity analysis, test confirmed COVID-19 cases only (N=5,695)

| Predictor                                      | Participants aged 5-11 years            |                                            | Participants aged 12-17 years           |                                            |
|------------------------------------------------|-----------------------------------------|--------------------------------------------|-----------------------------------------|--------------------------------------------|
|                                                | Crude (univariate) Odds Ratio (95% CIs) | <sup>a</sup> Adjusted Odds Ratio (95% CIs) | Crude (univariate) Odds Ratio (95% CIs) | <sup>b</sup> Adjusted Odds Ratio (95% CIs) |
| <b>Sex</b>                                     |                                         |                                            |                                         |                                            |
| Male                                           | -                                       | -                                          | -                                       | -                                          |
| Female                                         | 0.97 (0.60-1.57)                        | 0.98 (0.60-1.61)                           | 2.85 (2.35-3.45) ***                    | 2.63 (2.17-3.20) ***                       |
| <b>Ethnicity</b>                               |                                         |                                            |                                         |                                            |
| White                                          | -                                       | -                                          | -                                       | -                                          |
| Mixed                                          | 0.72 (0.26-2.04)                        | 0.71 (0.25-2.01)                           | 0.87 (0.60-1.27)                        | 0.86 (0.58-1.27)                           |
| Asian / Asian British                          | 0.33 (0.08-1.36)                        | 0.36 (0.09-1.53)                           | 0.64 (0.46-0.89)**                      | 0.64 (0.46-0.91)*                          |
| Black / African / Caribbean / Black British    | 1.00 (0.13-7.65)                        | 1.13 (0.14-8.83)                           | 0.97 (0.50-1.86)                        | 0.89 (0.45-1.74)                           |
| Other                                          | 1.42 (0.18-11.09)                       | 1.29 (0.15-10.73)                          | 1.67 (0.89-3.15)                        | 1.36 (0.70-2.64)                           |
| <b>IMD quintile</b>                            |                                         |                                            |                                         |                                            |
| 1 – most deprived                              | -                                       | -                                          | -                                       | -                                          |
| 2                                              | 1.56 (0.62-3.97)                        | 1.56 (0.60-4.11)                           | 1.00 (0.75-1.33)                        | 1.03 (0.76-1.39)                           |
| 3                                              | 0.85 (0.32-2.27)                        | 0.92 (0.34-2.52)                           | 0.82 (0.62-1.09)                        | 0.86 (0.64-1.15)                           |
| 4                                              | 0.86 (0.34-2.20)                        | 0.88 (0.34-2.31)                           | 0.81 (0.61-1.06)                        | 0.84 (0.63-1.12)                           |
| 5 – least deprived                             | 1.51 (0.64-3.54)                        | 1.58 (0.65-3.82)                           | 0.87 (0.67-1.13)                        | 0.93 (0.71-1.23)                           |
| <b>Comorbidities</b>                           |                                         |                                            |                                         |                                            |
| No                                             | -                                       | -                                          | -                                       | -                                          |
| Yes                                            | 2.35 (1.36-4.07)**                      | 2.26 (1.28-4.00)**                         | 2.36 (1.98-2.80)***                     | 2.09 (1.75-2.49)***                        |
| <b>Vaccination status at time of infection</b> |                                         |                                            |                                         |                                            |
| No                                             | -                                       | -                                          | -                                       | -                                          |
| At least one dose                              | -                                       | -                                          | 0.73 (0.52-1.03)                        | 0.72 (0.50-1.03)                           |
| <b>Dominant variant at time of infection</b>   |                                         |                                            |                                         |                                            |
| Wild type (before Dec 2020)                    | -                                       | -                                          | -                                       | -                                          |
| Alpha (Dec 2020-April 2021)                    | 0.78 (0.34-1.77)                        | 0.75 (0.32-1.74)                           | 0.64 (0.48-0.85)**                      | 0.63 (0.47-0.84)**                         |
| Delta (May 2021-Dec 2021)                      | 0.91 (0.46-1.78)                        | 0.82 (0.41-1.66)                           | 0.70 (0.56-0.87)**                      | 0.75 (0.60-0.95)*                          |

<sup>a</sup>Mutually adjusted for sex, ethnicity, IMD, comorbidities and dominant variant at time of infection; <sup>b</sup>Mutually adjusted for sex, ethnicity, IMD, comorbidities and vaccination status and dominant variant at time of infection; \*p<0.05, \*\*p<0.01\*, \*\*\*p<0.001
